# Supplementary material for: The influence of polyethylene glycol on the synthesis and activity of MoP for the hydrodechlorination of trichloroethylene
Source: Royal Society of Chemistry journal article supplement (doi:10.1039/c5ra23295c), 2016-01-01
Supplement: c5ra23295c1.pdf [file c5ra23295c1.pdf]

# Supporting Information: The Influence of Polyethylene Glycol on the Synthesis and Activity of MoP for the Hydrodechlorination of Trichloroethylene

Xiaomeng Liu, Lili Ren\*

*School of Chemistry & Chemical Engineering, Southeast University, Nanjing, 211189, China.*

AUTHOR INFORMATION

**Corresponding Author**

\*E-mail: [liliren@seu.edu.cn](mailto:liliren@seu.edu.cn)

## Experimental Details

Trichloroethylene HDC reactions were carried out on a continuous fixed-bed quartz reactor (id. = 10 mm) at 400-650°C and atmospheric pressure. 6 mL catalyst was put in the middle of the quartz reactor. The hydrogen flow rate was 100 mL/min. The produced HCl was trapped in a water bubbler and the amount of formed HCl can be determined very accurately by NaOH titration with a pH-indicator. So the decomposition rate of C-Cl bonds, can be calculated as the following formula:

$$R_{\text{C-Cl bonds decomposition}} = \frac{n(\text{HCl})}{3n(\text{C}_2\text{HCl}_3)} \times 100\%$$

## Characterization

Table S1 Intensity of different crystal planes

|             | I(100) | I(101) | I(102) | I(201) |
|-------------|--------|--------|--------|--------|
| PDF-65-6487 | 982.6  | 1417.9 | 155.7  | 185.1  |
| MoP         | 1293   | 1792   | 311    | 282    |
| MoP-PEG8000 | 1672   | 2641   | 449    | 336    |

These data are collected from XRD Characterization and PDF (65-6487). We choose peak height as intensity of crystal plane. The relative intensity of peaks can be calculated as the following formula:

$$R_{\text{Relative intensity of peaks}} = \frac{\text{Peak Height}}{\text{Maximum of Peak Height}} \times 100\%$$

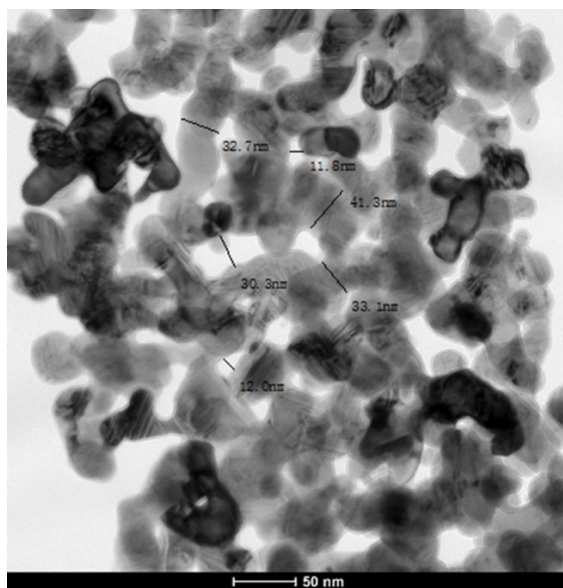

Fig.S1 TEM images of MoP-PEG8000

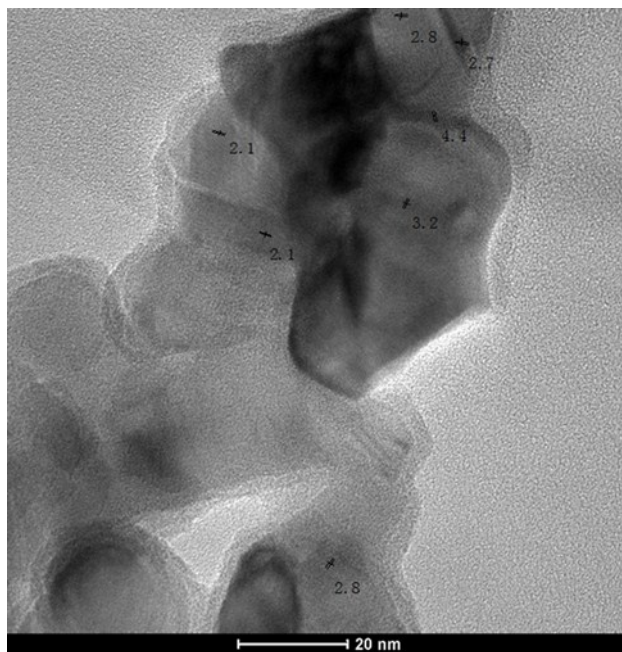

Fig.S2 Lattice spacing of MoP

The length of lattice spacing were measured and estimated by Digital Micrograph (a software) in the Fig.S1 and S2. Contrasted with PDF-65-6487, lattice spacing corresponds to crystal plane.

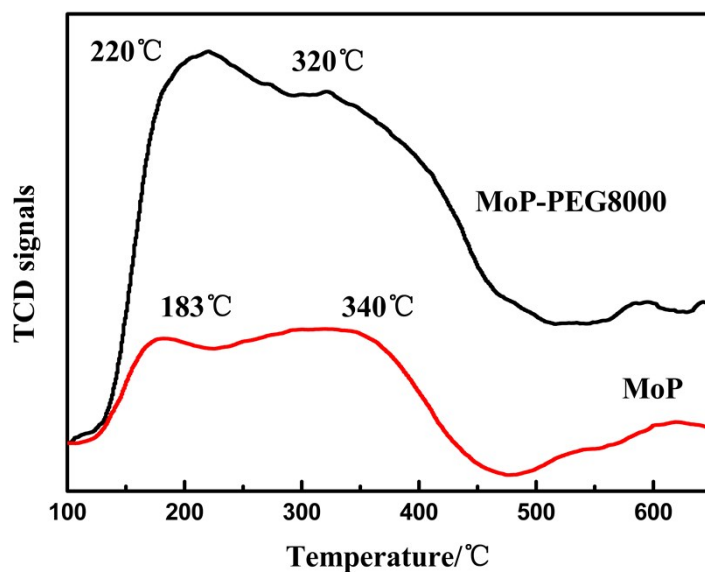

Fig.S3 NH<sub>3</sub>-TPD profiles of MoP and MoP-PEG8000 catalysts

Fig.S3 shows the NH<sub>3</sub>-TPD profiles of MoP and MoP-PEG8000 catalysts. MoP shows two desorption peaks at 183°C and 340°C, corresponding to weak acid sites and mediate strong acid sites, respectively. However, only mediate strong acid sites of MoP-PEG8000 are corresponding to 220°C and 320°C. Both catalysts show mediate strong acid sites, but peak area of MoP-PEG8000 is greater than MoP's. Adding PEG can change the structure of MoP, which further leads to the changes of the acid sites of MoP.
